# Supplementary material for: Association between Depressive Symptoms and Cognitive Function in Persons with Diabetes Mellitus: A Systematic Review
Source: PLOS journal article supplement (doi:10.1371/journal.pone.0160809), 2016-08-15
Supplement: S1 (10.1371/journal.pone.0160809.s001) [file journal.pone.0160809.s001]

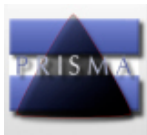

## PRISMA 2009 Flow Diagram

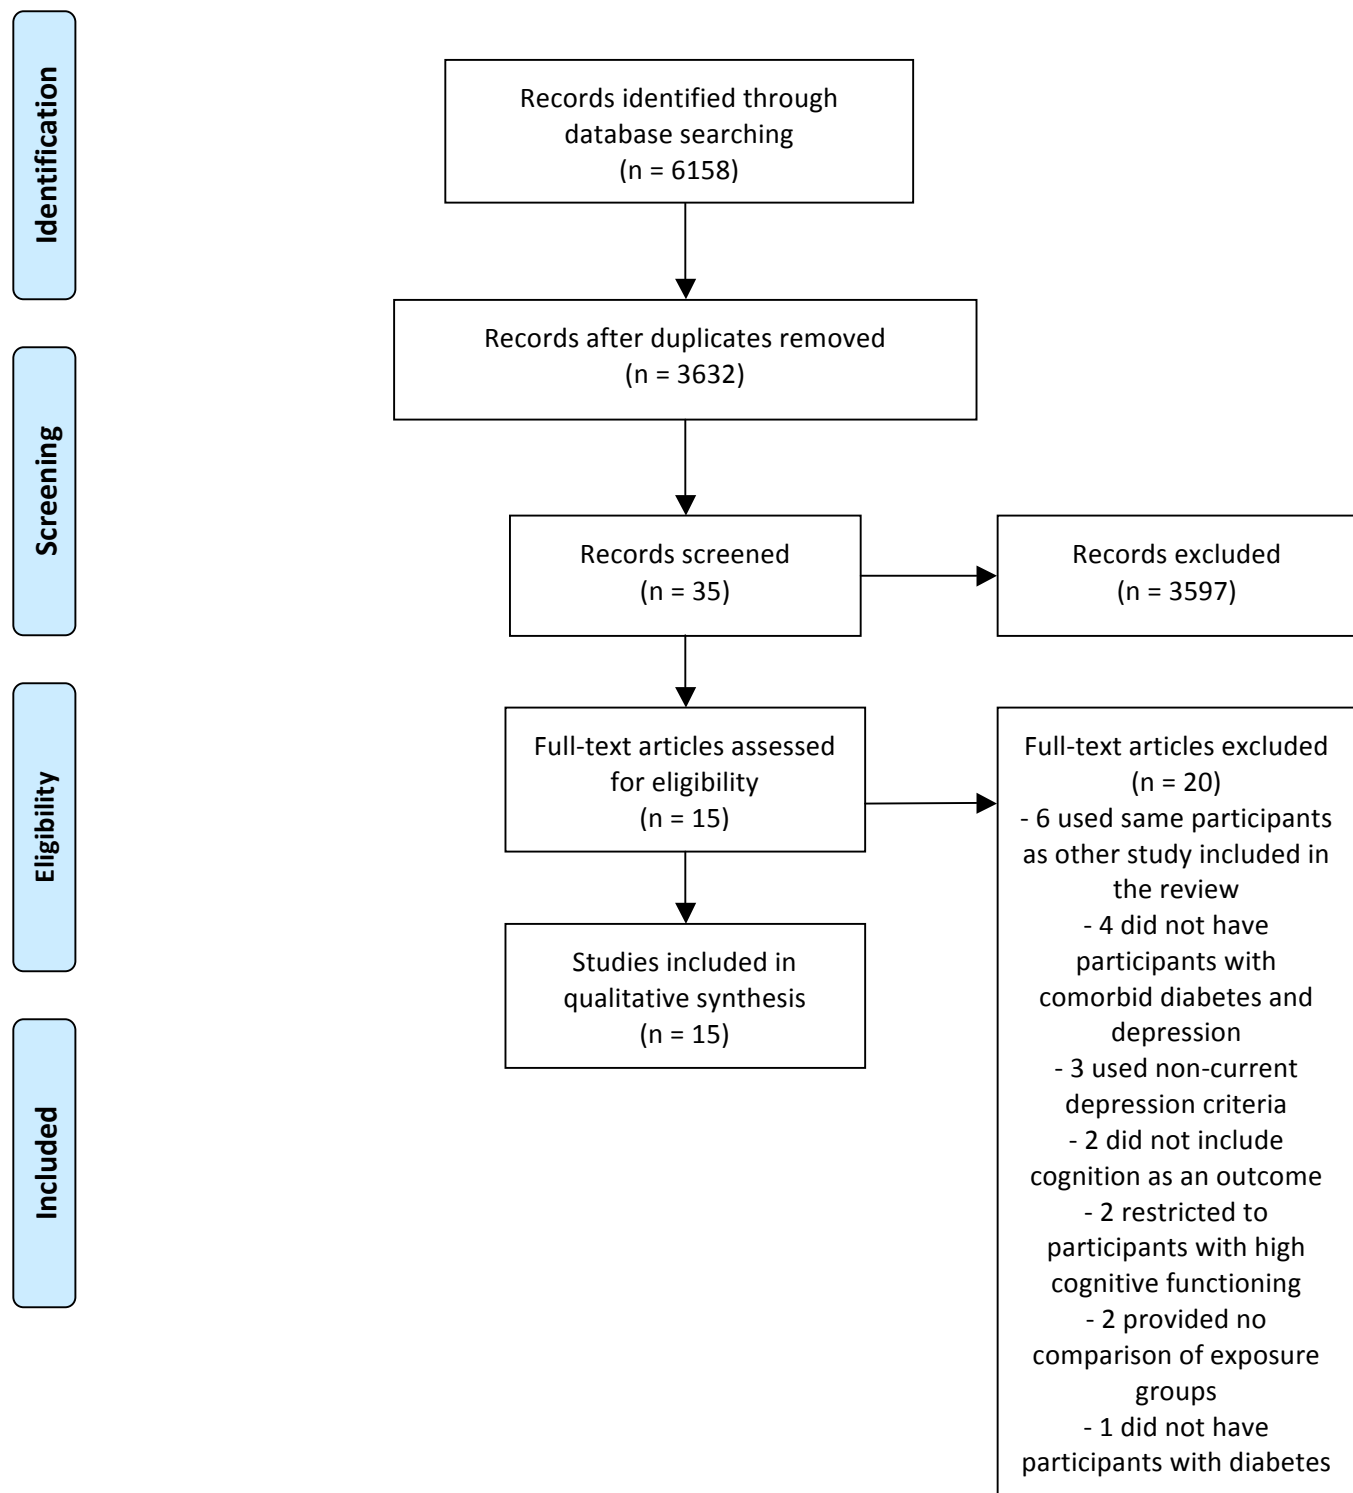

From: Moher D, Liberati A, Tetzlaff J, Altman DG, The PRISMA Group (2009). Preferred Reporting Items for Systematic Reviews and Meta-Analyses: The PRISMA Statement. PLoS Med 6(7): e1000097. doi:10.1371/journal.pmed1000097

For more information, visit [www.prisma-statement.org](http://www.prisma-statement.org).
